# Supplementary material for: A simple, quick and non-destructive approach for sampling drugs of abuse in tablets and blotter for qualitative analysis by paper spray mass spectrometry
Source: Royal Society of Chemistry journal article supplement (doi:10.1039/d3ay01393f), 2023-01-01
Supplement: d3ay01393f1.pdf [file d3ay01393f1.pdf]

## A simple, quick and non-destructive approach for sampling drugs of abuse in tablets and blotter for qualitative analysis by paper spray mass spectrometry

Mariana C. C. Diniz,<sup>a</sup> Fabiana de Moura,<sup>a,c</sup> Yuri Machado,<sup>\*b</sup> José Coelho Neto,<sup>b</sup> and Evandro Piccin<sup>a</sup>

<sup>a</sup> Departamento de Química, Instituto de Ciências Exatas, Universidade Federal de Minas Gerais, Antônio Carlos Str., 6627, CEP 31270-901, Belo Horizonte, MG, Brazil.

<sup>b</sup> Seção Técnica de Química e Física Legal – Divisão de Laboratório de Pesquisa, Instituto de Criminalística da Polícia Civil de Minas Gerais, Juiz de Fora Str., 400, CEP 30180-060, Belo Horizonte, MG, Brazil.

<sup>c</sup> Departamento de Química, Centro Federal de Educação Tecnológica de Minas Gerais, Amazonas Str., 5253, CEP 30421-169, Belo Horizonte, MG, Brazil.

\* [yurimachad@gmail.com](mailto:yurimachad@gmail.com), +55 31 98477-9786

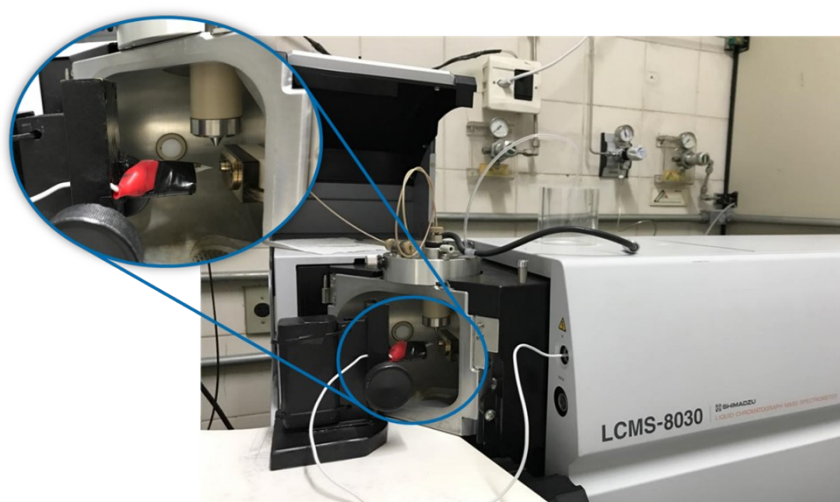

**Fig. 1S** Picture of the PS interface adapted on a Shimadzu mass spectrometer model LCMS 8030.

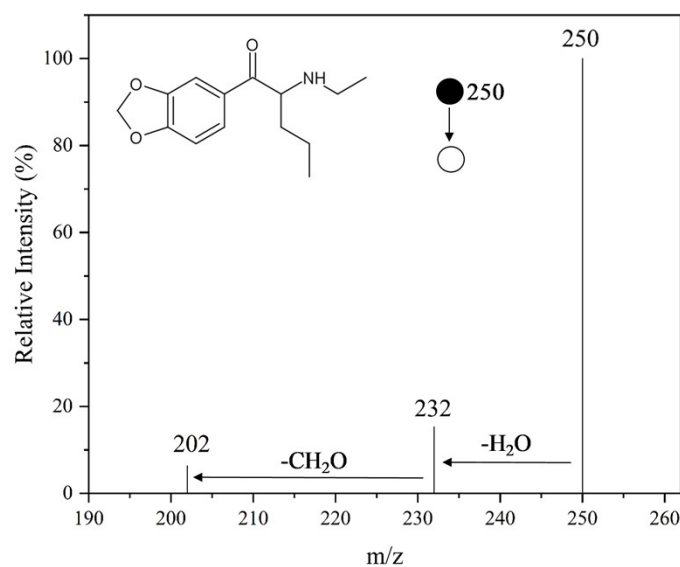

**Fig. 2S** PS(+)-MS/MS of *N*-ethylpentylone (NEP) recorded from a sample also containing U-47700 (a potent synthetic opioid also known as pink heroin). Conditions: support, filter paper; spray solvent, MeOH; spray solvent volume, 10  $\mu$ L; spray voltage, 4.5 kV; distance between paper tip and MS inlet, 10 mm; energy collision 5 V.

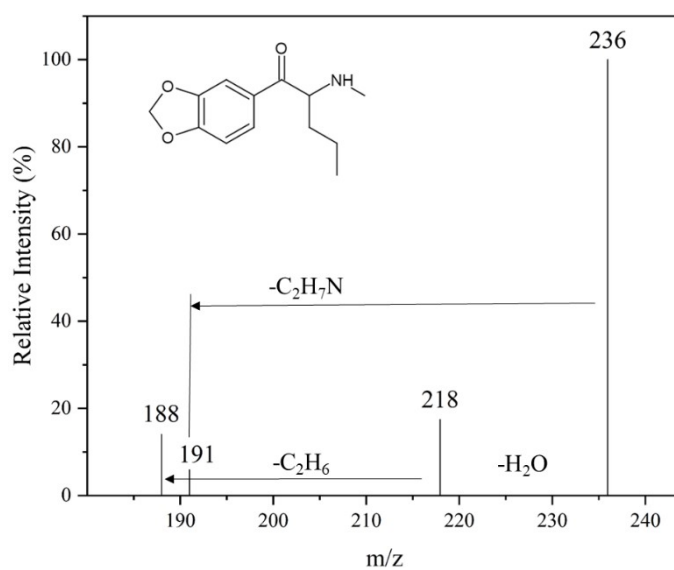

**Fig. 3S** PS(+)-MS/MS of pentylone recorded from a sample also containing NEP. Conditions: support, filter paper; spray solvent, MeOH; spray solvent volume, 10  $\mu$ L; spray voltage, 4.5 kV; distance between paper tip and MS inlet, 10 mm; energy collision 5 V.

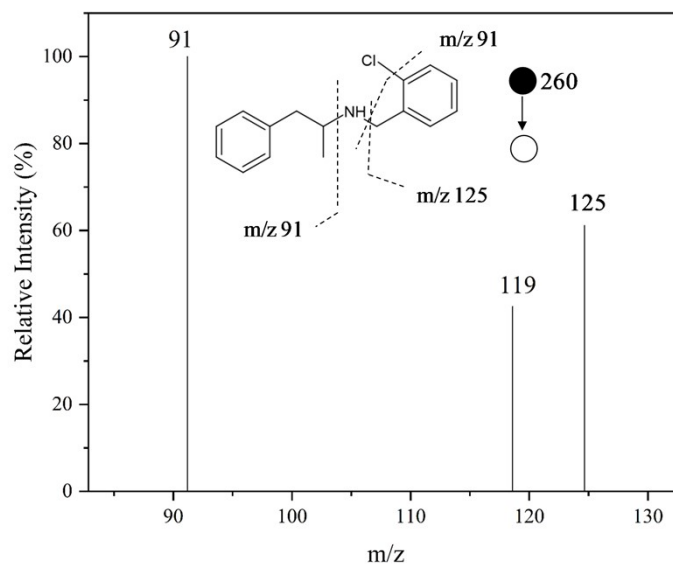

**Fig. 4S** PS(+)-MS/MS of clobenzorex. Conditions: support, blotter paper; spray solvent, MeOH:ACN (1:1 v/v); spray solvent volume, 10  $\mu$ L; spray voltage, 4.5 kV; distance between paper tip and MS inlet, 10 mm; energy collision, 5 V.

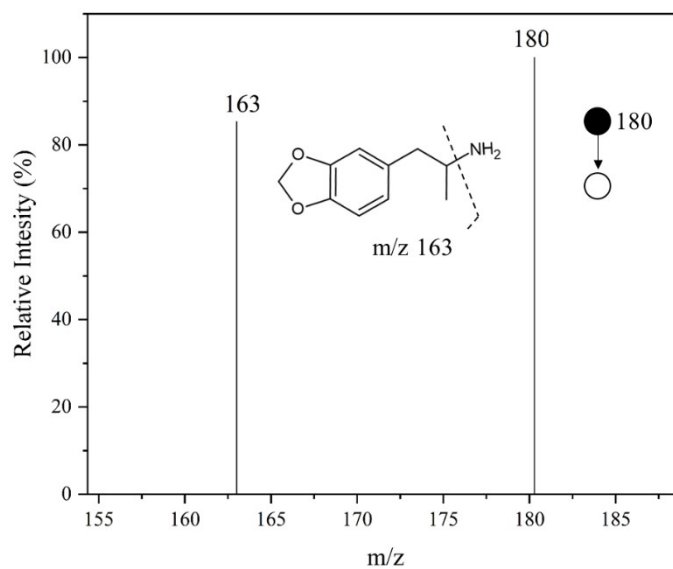

**Fig. 5S** PS(+)-MS/MS of MDA. Conditions: support, blotter paper; spray solvent, MeOH; spray solvent volume, 10  $\mu$ L; spray voltage, 4.5 kV; distance between paper tip and MS inlet, 10 mm; energy collision, 5 V.

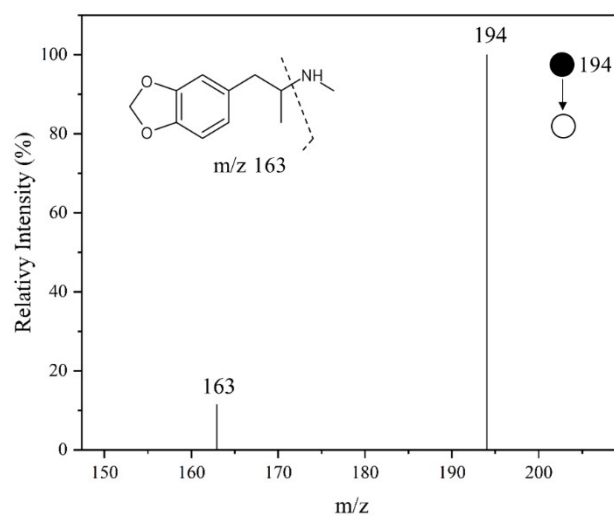

**Fig. 6S** PS(+)-MS/MS of MDMA. Conditions: support, blotter paper; spray solvent, MeOH; spray solvent volume, 10  $\mu$ L; spray voltage, 4.5 kV; distance between paper tip and MS inlet, 10 mm; energy collision, 5 V.

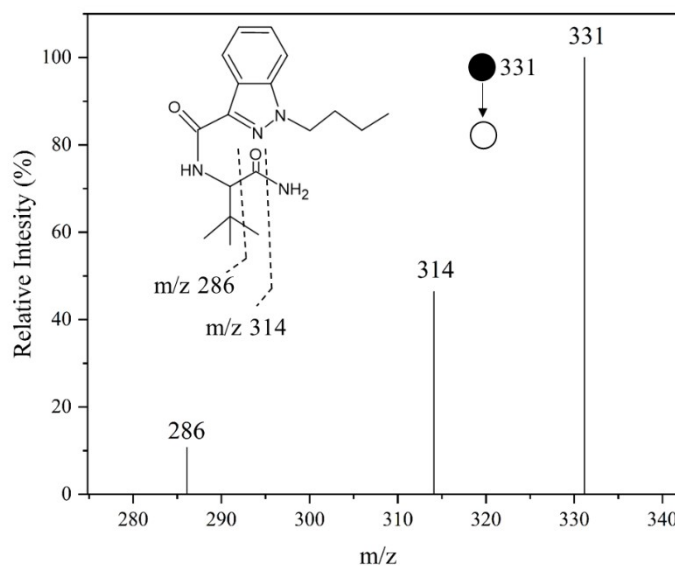

**Fig. 7S** PS(+)-MS/MS of ADB-BUTINACA. Conditions: support, filter paper; spray solvent, MeOH; spray solvent volume, 10  $\mu$ L; spray voltage, 4.5 kV; distance between paper tip and MS inlet, 10 mm; energy collision, 5 V.

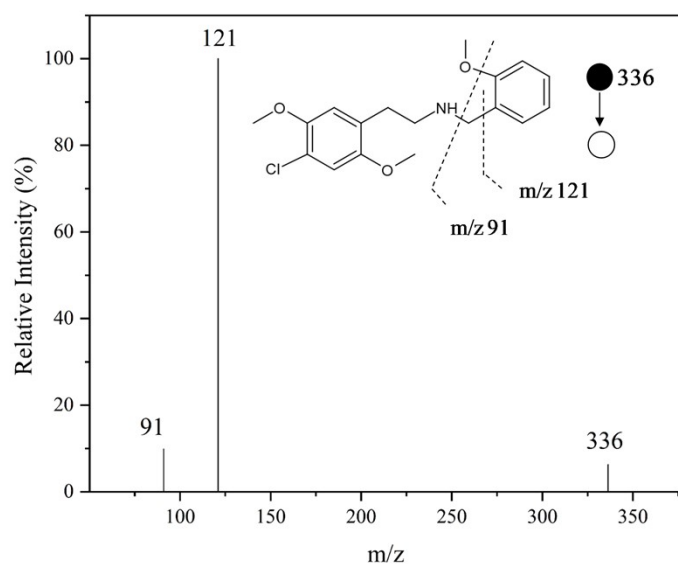

**Fig. 8S** PS(+)-MS/MS of 25C-NBOMe. Conditions: support, filter paper; spray solvent, MeOH; spray solvent volume, 10  $\mu$ L; spray voltage, 4.5 kV; distance between paper tip and MS inlet, 10 mm; energy collision, 5 V.

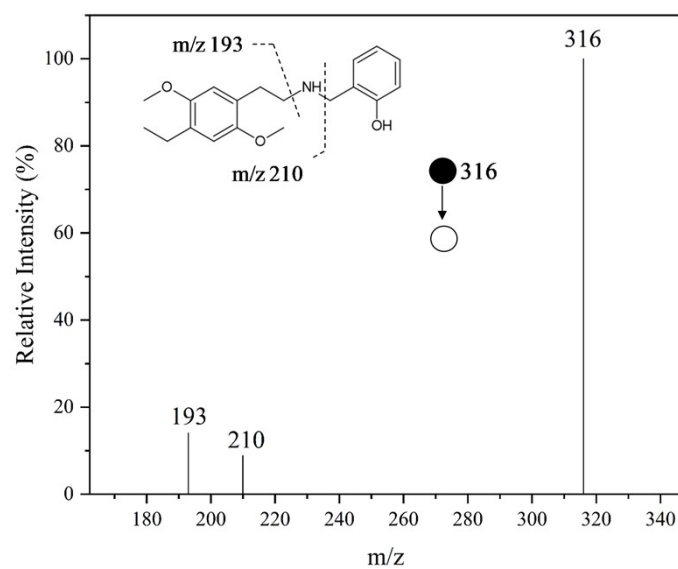

**Fig. 9S** PS(+)-MS/MS of 25E-NBOH. Conditions: support, blotter paper; spray solvent, MeOH:ACN (1:1 v/v); spray solvent volume, 10  $\mu$ L; spray voltage, 4.5 kV; distance between paper tip and MS inlet, 10 mm; energy collision, 5 V.

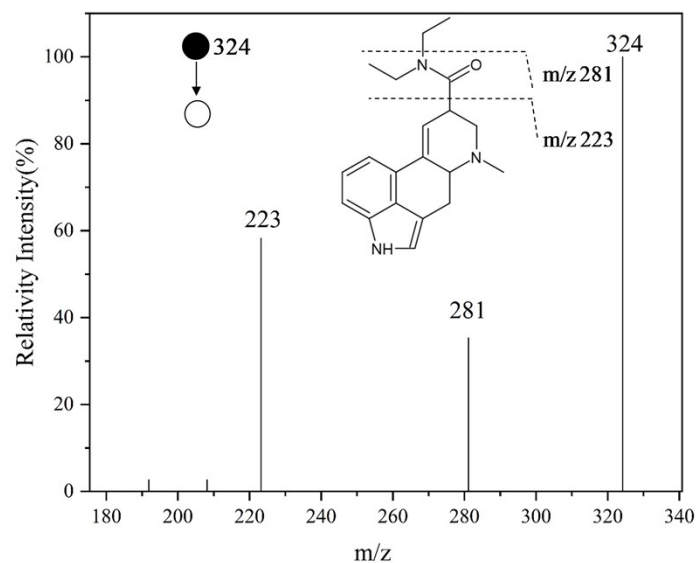

**Fig. 10S** PS(+)-MS/MS of 25C-NBOMe. Conditions: support, filter paper; spray solvent, MeOH; spray solvent volume, 10  $\mu$ L; spray voltage, 4.5 kV; distance between paper tip and MS inlet, 10 mm; energy collision, 20 V.

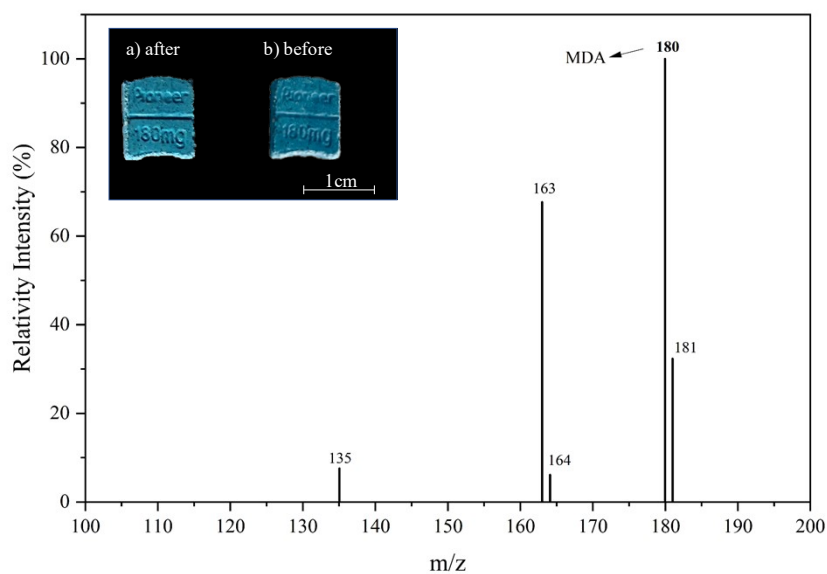

**Fig. 11S** PS(+)-MS spectrum of MDA after the 10 consecutive extractions with blotter paper and methanol as spray solvent. Photos of sample after 1 extraction and 10 consecutive extractions.
